# Supplementary material for: SYT8 promotes pancreatic cancer progression via the TNNI2/ERRα/SIRT1 signaling pathway
Source: PubMed Central journal article supplement (PMC8671424; doi:10.1038/s41420-021-00779-4), 2021-12-14
Supplement: 41420_2021_779_MOESM1_ESM.pdf [file 41420_2021_779_MOESM1_ESM.pdf]

Please complete the table below to indicate the contributions of all named authors to the figures.

Figure 1:

Acquisition of data: Xing Liang, Ligang Shi; Analysis of data: Xing Liang, Liang Tang; Interpretation of data: Xing Liang, Danlei Chen; Assembled the figure: Zhiping Fu

Figure 2:

Acquisition of data: Xing Liang, Ligang Shi; Analysis of data: Liang Tang, Danlei Chen; Interpretation of data: Liang Tang, Danlei Chen; Assembled the figure: Zhiping Fu

Figure 3:

Acquisition of data: Ligang Shi, Anan Liu; Analysis of data: Liang Tang, Danlei Chen; Interpretation of data: Liang Tang, Danlei Chen; Assembled the figure: Zhiping Fu

Figure 4:

Acquisition of data: Zhiping Fu, Xing Liang; Analysis of data: Zhiping Fu, Danlei Chen; Interpretation of data: Liang Tang, Danlei Chen; Assembled the figure: Xing Liang

Figure 5:

Acquisition of data: Xing Liang, Ligang Shi; Analysis of data: Zhiping Fu, Danlei Chen; Interpretation of data: Liang Tang, Danlei Chen; Assembled the figure: Zhiping Fu

Figure 6:

Acquisition of data: Xing Liang, Anan Liu; Analysis of data: Xing Liang, Danlei Chen; Interpretation of data: Liang Tang, Danlei Chen; Assembled the figure: Zhiping Fu

Signed for and on behalf of the Author(s):

*Chenghao Shao*

Print Name:

Chenghao Shao

Date:

2021. 10. 21
